1 **Altered stomatal patterning accompanies a trichome dimorphism in a natural**  
2 **population of Arabidopsis**

3

4

5 Noriane M. L. Simon<sup>1</sup>, Jiro Sugisaka<sup>2</sup>, Mie N. Honjo<sup>2</sup>, Sverre Aarseth Tunstad<sup>1</sup>, George  
6 Tunna<sup>1</sup>, Hiroshi Kudoh<sup>2</sup>, Antony N. Dodd<sup>1\*</sup>

7

8

9 1. School of Biological Sciences, University of Bristol, Bristol BS8 1TQ, U.K.

10

11 2. Center for Ecological Research, Kyoto University, Otsu, Shiga, Japan.

12

13 \* Corresponding author; [antony.dodd@bristol.ac.uk](mailto:antony.dodd@bristol.ac.uk)

14

15 Keywords: stomata, environmental adaptation, development, herbivory.

16

17 **Abstract**

18 Trichomes are large epidermal cells on the surface of leaves that are thought to deter  
19 herbivores, yet the presence of trichomes can also negatively impact plant growth and  
20 reproduction. Stomatal guard cells and trichomes have shared developmental origins, and  
21 experimental manipulation of trichome formation can lead to changes in stomatal density.  
22 The influence of trichome formation upon stomatal development in natural populations of  
23 plants is currently unknown. Here, we show that a natural population of *Arabidopsis halleri*  
24 that includes hairy (trichome-bearing) and glabrous (no trichomes) morphs has differences in  
25 stomatal density that are associated with this trichome dimorphism. We found that glabrous  
26 morphs had significantly greater stomatal density and stomatal index than hairy morphs.  
27 One interpretation is that this arises from a trade-off between the proportions of cells that  
28 have trichome and guard cell fates during leaf development. The differences in stomatal  
29 density between the two morphs might have impacts upon environmental adaptation, in  
30 addition to herbivory deterrence caused by trichome development.

31

## 32 Introduction

33 In *Arabidopsis*, trichomes are large epidermal cells that protrude from the surface of the  
34 leaves and petioles. Trichomes play important roles in both biotic defences and abiotic  
35 stress tolerance (Levin, 1973; Mauricio and Rausher, 1997; Handley et al., 2005; Dalin et al.,  
36 2008; Sletvold et al., 2010; Sletvold and Ågren, 2012; Sato and Kudoh, 2016). However,  
37 trichome development appears to impose a fitness cost on growth and reproduction  
38 (Mauricio, 1998; Sletvold et al., 2010; Kawagoe et al., 2011; Sletvold and Ågren, 2012; Sato  
39 and Kudoh, 2016). In addition to trichomes, stomatal guard cells represent another  
40 specialized cell type that is present on the leaf surface. Trichome initiation occurs prior to  
41 stomatal meristemoid development, and the patterning of trichomes and guard cells appears  
42 to be linked (Larkin et al., 1996; Glover, 2000; Bean et al., 2002; Bird and Gray, 2003).  
43 Therefore, there might be a trade-off between trichome and stomatal guard cell development  
44 during leaf formation (Glover et al., 1998).

45 We wished to determine whether trichome formation might be associated with changes in  
46 stomatal patterning in natural populations of plants. To achieve this, we investigated  
47 stomatal patterning in a naturally-occurring population of *Arabidopsis halleri* subsp.  
48 *gemmifera* that includes trichome-forming and glabrous morphs (Kawagoe et al., 2011; Sato  
49 and Kudoh, 2016). The glabrous morphs within this population harbour a large transposon-  
50 like insertion within the *GLABRA1* (*GL1*) gene (Kawagoe et al., 2011). *GL1* is also required  
51 for trichome formation in *A. thaliana*, with homozygous *gl1* mutants being glabrous  
52 (Oppenheimer et al., 1991). Our experiments provide new insights into the relationship  
53 between stomatal and trichome patterning under natural conditions.

## 54 **Methods**

### 55 *Study site and experimental model*

56 This investigation used a well-characterized population of *Arabidopsis halleri* subsp.  
57 *gemmifera* that is located beside a small stream in central Honshu island, Japan (Fig. 1A)  
58 (35°06' N, 134°55' E) (Aikawa et al., 2010; Kudoh et al., 2018). Sampling occurred during  
59 September 2016 (photoperiod approximately 12 h, with dawn at 05:40 and dusk at 18:10).  
60 During this season, *A. halleri* bore larger rosette leaves that are well-suited for quantification  
61 of stomatal density (Fig. 1B).

### 62 *Stomatal density measurement*

63 Eight plants of each trichome morph (hairy or glabrous) were selected at the study site, with  
64 individuals chosen such that the replicate plants were distributed evenly across the site.  
65 Glabrous and hairy morphs were identified by visual inspection of the leaf surface. Stomatal  
66 density was measured by obtaining impressions from the adaxial surfaces of 3-5 rosette  
67 leaves of each plant. Data were obtained from 58 and 62 leaves of hairy and glabrous  
68 plants, respectively. We focused on the adaxial surface because this surface also harbours  
69 the majority of the trichomes. Between the times of 12:00 and 13:00, President Plus dental  
70 impression paste (Coltene) was applied to the adaxial side of each leaf to create a leaf  
71 surface impression (Fig. 1C). Solidified impression paste was removed from leaves and  
72 transported to the laboratory for further processing. First, each impression was assigned a  
73 randomly-generated number to ensure subsequent steps were performed blind. Each leaf  
74 impression was painted with transparent nail varnish (60 seconds super shine, Rimmel) that,  
75 after drying, was peeled away from the dental impression paste using transparent adhesive  
76 tape (Scotch Crystal). Next, the adhesive tape was used to attach the nail varnish  
77 impression to a 0.8 mm – 1 mm thick microscope slide. Leaf impressions were examined  
78 using an epifluorescence microscope in white light illumination mode. Images were captured  
79 from the centre of each leaf half, away from the midrib, using a Hamamatsu camera and

80 Volocity software set to 20x zoom. Two images were captured from each impression, and  
81 the number of stomata and pavement cells was counted in an 800  $\mu\text{m}$  x 800  $\mu\text{m}$  square  
82 using the Fiji software to obtain cell density measures. Cell density measures were  
83 expressed as per  $\text{mm}^2$  (multiplication by 1.56). Stomatal index was calculated according to  
84 Equation 1. After all measurements, data were disaggregated according to a  
85 blinding/randomization scheme. The differences between hairy and glabrous plants were  
86 statistically tested by nested analysis of variance, whereby leaves were nested within the  
87 hairy and glabrous morphs. Tests were conducted using the R 3.6.0 software (R Core Team,  
88 2019) and plots generated with the beeswarm R package (v0.2.3) and Inkscape v0.91. No  
89 adjustments were applied to images in Fig. 1.

$$SI = \frac{s}{s + p} \times 100$$

90 **Equation 1.** Derivation of stomatal index, where *SI* is stomatal index, *s* is the number of  
91 stomata in the field of view, and *p* is the number of epidermal pavement cells in the field of  
92 view.

### 93 **Results**

94 We investigated stomatal patterning in naturally-occurring hairy and glabrous morphs of *A.*  
95 *halleri* (Sato and Kudoh, 2016). Approximately half of the *A. halleri* population at this study  
96 site is glabrous, whilst remaining plants have trichomes (Kawagoe et al., 2011). As trichome  
97 initiation occurs prior to stomatal meristemoid formation (Larkin et al., 1996; Glover, 2000), it  
98 is likely that trichome and stomatal patterning are linked (Bean et al., 2002), so we  
99 hypothesized that this might produce a difference in stomatal density between the two  
100 trichome morphs of *A. halleri* under natural conditions.

101 We found that the trichome formation dimorphism was accompanied by a difference in  
102 stomatal density (Fig. 2A; Supplemental Dataset S1). Glabrous morphs had significantly  
103 greater stomatal density compared with hairy-leaved morphs (glabrous:  $31.4 \pm 1.5$  stomata

104 mm<sup>-2</sup>; hairy: 23.7 ± 1.1 stomata mm<sup>-2</sup>; ± s.e.m) (Fig. 2A; Table S1A; Supplemental Dataset  
105 S1). Furthermore, the stomatal index was significantly greater in glabrous morphs (18.13  
106 ± 0.41) compared with hairy morphs (16.11 ± 0.46) (Fig. 2B; Table S1B). The pavement cell  
107 density did not differ significantly between the morphs (Table S1C). Stomatal density ranged  
108 from 17 – 87 stomata mm<sup>-2</sup> for hairy morphs and 27 – 119 stomata mm<sup>-2</sup> for glabrous  
109 morphs (Fig. 2A). This stomatal density was lower than for *Arabidopsis thaliana*, which has  
110 reported stomatal densities of 180 – 350 stomata mm<sup>-2</sup> depending on background accession  
111 and growth conditions (Gray et al., 2000; Zhang et al., 2008; Franks et al., 2015).

## 112 Discussion

113 Glabrous plants had significantly greater stomatal density and stomatal index compared with  
114 hairy plants (Fig. 2A; Fig. 2B). As the density of surrounding pavement cells did not vary  
115 between the morphs, these differences in stomatal density and index are due to the greater  
116 density of stomata in glabrous morphs compared with hairy morphs (Fig. 2B). Our field data  
117 are consistent with a laboratory-based study in which transgenic tobacco plants expressing  
118 an *Antirrhinum myb*-like transcription factor, which caused an excess of trichomes, also had  
119 significantly reduced stomatal density (Glover et al., 1998). Similarly, the trichome-bearing  
120 Col-0 accession of *A. thaliana* has lower stomatal density than the glabrous C24 accession  
121 (e.g. about 115 mm<sup>-2</sup> for Col-0 and 180 mm<sup>-2</sup> for C24) (Perazza et al., 1998; Lake and  
122 Woodward, 2008). This suggests that in natural populations of *A. halleri*, there could be a  
123 trade-off between trichome and stomatal development. Since the glabrous *gl1* mutant of *A.*  
124 *thaliana* has a significantly greater density of stomatal units compared with the wild type  
125 (Berger et al., 1998) and the glabrous phenotype of *A. halleri* at this study site is associated  
126 with an insertion within *GL1* (Kawagoe et al., 2011), it is possible that the *GL1* haplotype  
127 influences the stomatal density within this population of *A. halleri*.

128 In some cases, there does not appear to be a tradeoff between stomatal and trichome  
129 density. For example, elevated CO<sub>2</sub> decreases stomatal density (Woodward and Kelly,

130 1995), but might also reduces trichome density (Bidart-Bouzat et al., 2005). Therefore, in  
131 future, it could be informative to examine the relationship between stomatal and trichome  
132 density under a range of different experimental conditions that apply different types of  
133 selection pressure.

134 Interestingly, trichome production appears to impose a fitness cost. For example, glabrous  
135 *A. halleri* plants have 10% greater biomass than hairy plants when grown in the absence of  
136 herbivores (Sato and Kudoh, 2016). This cost of herbicide resistance arising from trichome  
137 formation also occurs in glabrous and hairy *A. lyrata* (Løe et al., 2007; Sletvold et al., 2010)  
138 and *A. thaliana* (Mauricio and Rausher, 1997; Mauricio, 1998) under experimental conditions  
139 excluding herbivores. Whilst this fitness advantage of glabrous over hairy leaves in the  
140 absence of herbivory might be due to trichome production (Mauricio and Rausher, 1997;  
141 Mauricio, 1998; Kawagoe and Kudoh, 2010; Sletvold et al., 2010; Kawagoe et al., 2011;  
142 Sletvold and Ågren, 2012), we suggest that glabrous morphs might also gain an advantage  
143 by having a greater density or number of stomata. It has been proposed that increasing the  
144 number of stomata could increase carbon assimilation (Lawson and Blatt, 2014). For  
145 example, *Arabidopsis* overexpressing STOMAGEN has greater stomatal density and a 30%  
146 increase in carbon assimilation compared with the wild type. However, these lines also have  
147 a higher transpiration rates and consequently lower water use efficiency (Tanaka et al.,  
148 2013).

149 Optimal stomatal density is important to achieve high photosynthetic rates. A low stomatal  
150 density restricts CO<sub>2</sub> vertical diffusion through the leaf and reduces photosynthetic rates,  
151 whilst high-density stomatal clustering diminishes CO<sub>2</sub> diffusion and causes low carbon  
152 assimilation (Lawson and Blatt, 2014). Both *A. halleri* morphs examined are likely to be  
153 within an optimal range of stomatal densities, having evolved and survived under natural  
154 conditions. However, the higher stomatal density in the glabrous morph might contribute to  
155 its faster growth in absence of herbivory (Sato and Kudoh, 2016). In future, it would be  
156 interesting to explore this by measuring the CO<sub>2</sub> assimilation rate of these trichome morphs

157 under laboratory and/or natural conditions. It would also be informative to determine whether  
158 the stomatal density difference between the two trichome morphs confers any advantages  
159 within microenvironments characterized by differences in water or light availability. The lower  
160 stomatal density of *A. halleri* compared with *A. thaliana* (Gray et al., 2000; Zhang et al.,  
161 2008; Franks et al., 2015) might reflect differences in growth conditions. An alternative  
162 explanation might relate to genome size, because there appears to be a negative correlation  
163 between genome size and stomatal density (Beaulieu et al., 2008), and the genome of *A.*  
164 *halleri* (250 Mb) is approximately double the size of the *A. thaliana* genome (125 Mb) (The  
165 Arabidopsis Genome Initiative, 2000; Briskine et al., 2017).

166 In summary, we found that glabrous morphs of *A. halleri* growing under natural conditions  
167 had higher stomatal density and stomatal index than a hairy morph. This might contribute to  
168 the reported fitness advantage of glabrous plants over hairy plants in absence of herbivores  
169 (Sato and Kudoh, 2017). This differing stomatal density phenotype might derive from the  
170 common upstream components in the pathways leading to trichome and guard cell  
171 development.

## 172 **Acknowledgements**

173 We thank Dora Cano-Ramirez, Haruki Nishio and Tasuku Ito for experimental assistance.  
174 This research was funded by the UK Biotechnology and Biological Sciences Research  
175 Council (BBSRC; grant BB/J014400/1), The Royal Society (grant IE140501), and the Japan  
176 Society for Promotion of Science (JSPS; CREST no. JPMJCR15O1). This research was  
177 conducted using Joint Usage of the Center for Ecological Research, Kyoto University.

## 178 **Conflict of Interests**

179 The authors declare no competing financial interests.



180 **Author contributions**

181 NMLS, JS, MNH, SAT, GT, HK and AND performed experimentation and/or analysed data,  
182 and NMLS, HK and AND wrote the paper.

183 **Data availability**

184 All data generated during this study are included in the published article and Supplementary  
185 Information files.

186

187 **Figure legends**

188 **Figure 1.** Field sampling of *Arabidopsis halleri* for stomatal density. (A) Overview of field  
189 site; (B) Rosette form of *A. halleri* plants during September sampling season; (C) Leaf  
190 surface impression acquisition using impression paste. The impression paste is green-  
191 coloured and occupies the surface of three rosette leaves.

192 **Figure 2.** Stomatal density differs between hairy and glabrous morphs within a natural  
193 population of *Arabidopsis halleri*. (A) Stomatal density and (B) stomatal index for hairy and  
194 glabrous morphs. Each red point represents one measurement and the centre line of the  
195 boxplot indicates the median. Data are mean  $\pm$  s.e.m (n = 58 (hairy plants) and n = 62  
196 (glabrous plants); analysed by one-way nested ANOVA. \* indicates  $p < 0.05$ ; \*\* indicates  $p <$   
197 0.01.

198 **Table S1.** Nested ANOVA analysis of (a) stomatal density, (b) stomatal index and (c)  
199 pavement cell density. Df is degree of freedom; \*, \*\* and \*\*\* indicates significant at  $p < 0.05$ ,  
200  $p < 0.01$  and  $p < 0.001$  respectively; NS, not significant at  $p > 0.05$ .

201 **Dataset S1.** Complete stomatal density data collected during experimentation.

202 **References**

203

204 **Aikawa S, Kobayashi MJ, Satake A, Shimizu KK, Kudoh H (2010) Robust control of the**  
205 **seasonal expression of the *Arabidopsis FLC* gene in a fluctuating environment.**  
206 **Proceedings of the National Academy of Sciences 107: 11632-11637**

207 **Bean GJ, Marks MD, Hulskamp M, Clayton M, Croxdale JL (2002) Tissue patterning of**  
208 ***Arabidopsis* cotyledons. New Phytologist 153: 461-467**

209 **Beaulieu JM, Leitch IJ, Patel S, Pendharkar A, Knight CA (2008) Genome size is a**  
210 **strong predictor of cell size and stomatal density in angiosperms. New**  
211 **Phytologist 179: 975-986**

212 **Berger F, Linstead P, Dolan L, Haseloff J (1998) Stomata patterning on the hypocotyl**  
213 **of *Arabidopsis thaliana* is controlled by genes involved in the control of root**  
214 **epidermis patterning. Developmental Biology 194: 226-234**

215 **Bidart-Bouzat MG, Mithen R, Berenbaum MR (2005) Elevated CO<sub>2</sub> influences**  
216 **herbivory-induced defense responses of *Arabidopsis thaliana*. Oecologia 145:**  
217 **415-424**

218 **Bird SM, Gray JE (2003) Signals from the cuticle affect epidermal cell differentiation.**  
219 **New Phytologist 157: 9-23**

220 **Briskine RV, Paape T, Shimizu-Inatsugi R, Nishiyama T, Akama S, Sese J, Shimizu KK**  
221 **(2017) Genome assembly and annotation of *Arabidopsis halleri*, a model for**  
222 **heavy metal hyperaccumulation and evolutionary ecology. Molecular Ecology**  
223 **Resources 17: 1025-1036**

224 **Dalin P, Agren J, Bjorkman C, Huttunen P, Karkkainen K (2008) Leaf trichome**  
225 **formation and plant resistance to herbivory. In A Schaller, ed, Induced plant**  
226 **resistance to herbivory. Springer, pp 89-105**

227 **Franks PJ, W. Doheny-Adams T, Britton-Harper ZJ, Gray JE (2015) Increasing water-**  
228 **use efficiency directly through genetic manipulation of stomatal density. New**  
229 **Phytologist 207: 188-195**

230 **Glover BJ (2000) Differentiation in plant epidermal cells. Journal of Experimental**  
231 **Botany 51: 497-505**

232 **Glover BJ, Perez-Rodriguez M, Martin C (1998) Development of several epidermal cell**  
233 **types can be specified by the same MYB-related plant transcription factor.**  
234 **Development 125: 3497**

235 **Gray JE, Holroyd GH, van der Lee FM, Bahrami AR, Sijmons PC, Woodward FI,**  
236 **Schuch W, Hetherington AM (2000) The HIC signalling pathway links CO<sub>2</sub>**  
237 **perception to stomatal development. Nature 408: 713-716**

238 **Handley R, Ekbohm B, Ågren J (2005) Variation in trichome density and resistance**  
239 **against a specialist insect herbivore in natural populations of *Arabidopsis***  
240 ***thaliana*. Ecological Entomology 30: 284-292**

- 241 Kawagoe T, Kudoh H (2010) Escape from floral herbivory by early flowering in  
242 *Arabidopsis halleri* subsp. *gemmaifera*. *Oecologia* 164: 713-720
- 243 Kawagoe T, Shimizu KK, Kakutani T, Kudoh H (2011) Coexistence of trichome  
244 variation in a natural plant population: A combined study using ecological and  
245 candidate gene approaches. *PLOS ONE* 6: e22184
- 246 Kudoh H, Honjo MN, Nishio H, Sugisaka J (2018) The long-term "in natura" study sites  
247 of *Arabidopsis halleri* for plant transcription and epigenetic modification  
248 analyses in natural environments. *In Plant Transcription Factors*. Springer, pp  
249 41-57
- 250 Lake JA, Woodward FI (2008) Response of stomatal numbers to CO<sub>2</sub> and humidity:  
251 control by transpiration rate and abscisic acid. *New Phytologist* 179: 397-404
- 252 Larkin JC, Young N, Prigge M, Marks MD (1996) The control of trichome spacing and  
253 number in *Arabidopsis*. *Development* 122: 997-1005
- 254 Lawson T, Blatt MR (2014) Stomatal size, speed, and responsiveness impact on  
255 photosynthesis and water use efficiency. *Plant Physiology* 164: 1556-1570
- 256 Levin DA (1973) The role of trichomes in plant defense. *The Quarterly Review of*  
257 *Biology* 48: 3-15
- 258 Løe G, Toräng P, Gaudeul M, Ågren J (2007) Trichome production and spatiotemporal  
259 variation in herbivory in the perennial herb *Arabidopsis lyrata*. *Oikos* 116: 134-  
260 142
- 261 Mauricio R (1998) Costs of resistance to natural enemies in field populations of the  
262 annual plant *Arabidopsis thaliana*. *The American Naturalist* 151: 20-28
- 263 Mauricio R, Rausher MD (1997) Experimental manipulation of putative selective  
264 agents provides evidence for the role of natural enemies in the evolution of  
265 plant defense. *Evolution* 51: 1435-1444
- 266 Oppenheimer DG, Herman PL, Sivakumaran S, Esch J, Marks MD (1991) A *myb* gene  
267 required for leaf trichome differentiation in *Arabidopsis* is expressed in  
268 stipules. *Cell* 67: 483-493
- 269 Perazza D, Vachon G, Herzog M (1998) Gibberellins promote trichome formation by  
270 up-regulating *GLABROUS1* in *Arabidopsis*. *Plant Physiology* 117: 375-383
- 271 Sato Y, Kudoh H (2016) Associational effects against a leaf beetle mediate a minority  
272 advantage in defense and growth between hairy and glabrous plants.  
273 *Evolutionary Ecology* 30: 137-154
- 274 Sato Y, Kudoh H (2017) Fine-scale frequency differentiation along a herbivory  
275 gradient in the trichome dimorphism of a wild *Arabidopsis*. *Ecology and*  
276 *Evolution* 7: 2133-2141
- 277 Sletvold N, Ågren J (2012) Variation in tolerance to drought among Scandinavian  
278 populations of *Arabidopsis lyrata*. *Evolutionary Ecology* 26: 559-577

- 279 **Sletvold N, Huttunen P, Handley R, Kärkkäinen K, Ågren J (2010) Cost of trichome**  
280 **production and resistance to a specialist insect herbivore in *Arabidopsis***  
281 ***lyrata*. Evolutionary Ecology 24: 1307-1319**
- 282 **Tanaka Y, Sugano SS, Shimada T, Hara-Nishimura I (2013) Enhancement of leaf**  
283 **photosynthetic capacity through increased stomatal density in *Arabidopsis*.**  
284 **New Phytologist 198: 757-764**
- 285 **R Core Team (2019) R: A language and environment for statistical computing. R**  
286 **Foundation for Statistical Computing, Vienna, Austria. URL [https://http://www.R-](https://http://www.R-project.org/)**  
287 **project.org/.**
- 288 **The Arabidopsis Genome Initiative (2000) Analysis of the genome sequence of the**  
289 **flowering plant *Arabidopsis thaliana*. Nature 408: 796-815**
- 290 **Woodward FI, Kelly CK (1995) The influence of CO<sub>2</sub> concentration on stomatal**  
291 **density. New Phytologist 131: 311-327**
- 292 **Zhang L, Hu G, Cheng Y, Huang J (2008) Heterotrimeric G protein  $\alpha$  and  $\beta$  subunits**  
293 **antagonistically modulate stomatal density in *Arabidopsis thaliana*.**  
294 **Developmental Biology 324: 68-75**
- 295
- 296
- 297

Simon et al. Fig. 1

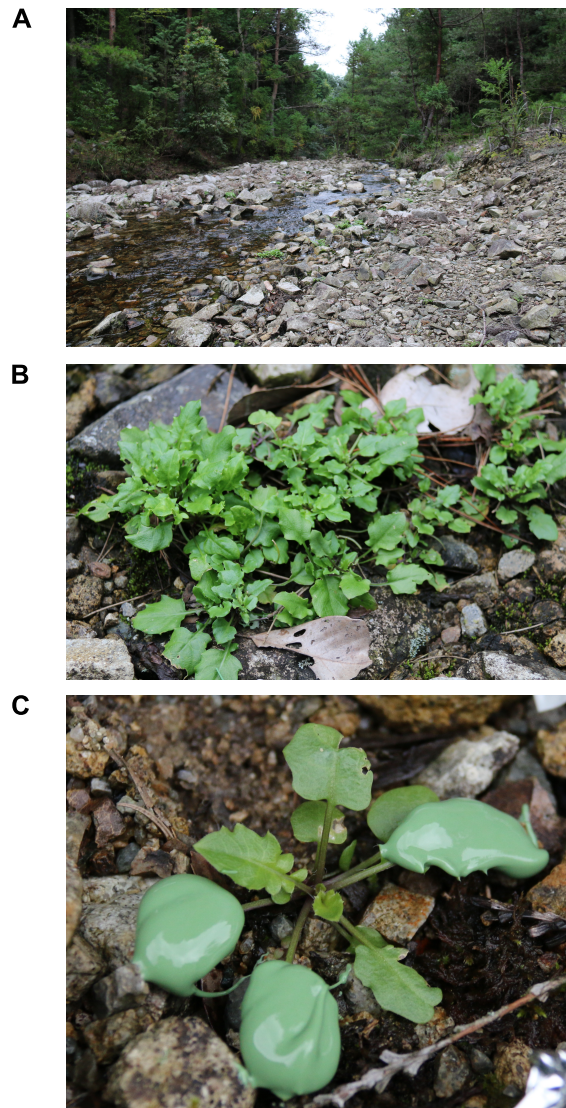

Simon et al. Fig. 2

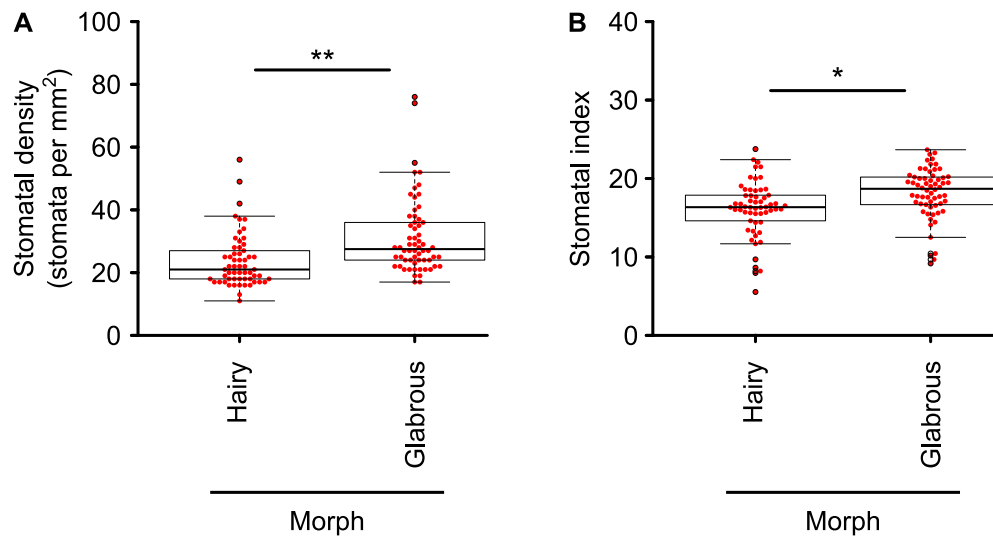

Source: https://www.biorxiv.org/content/10.1101/710889v1.full.pdf
